# Supplementary material
Source: Copernicus journal article supplement (doi:10.5194/acp-26-4953-2026)
Supplement: Supplementary file 1 [file acp-26-4953-2026-supplement.pdf]

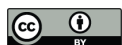

*Supplement of*

**Measurement report: Nitrogen isotope ( $\delta^{15}\text{N}$ ) signatures of ammonia emissions from livestock farming: implications for source apportionment of haze pollution**

**Jinhan Wang et al.**

*Correspondence to:* Yupeng Zhang (zhangyp@henau.edu.cn) and Hongen Liu (liuhongen7178@126.com)

The copyright of individual parts of the supplement might differ from the article licence.

# 1 **Supporting Information**

## 2 **Supplementary Information Contents:**

3 In total 4 pages including:

4 1.Text S1 (Pages )

5 2.Figures S1 to S4

6 3.Table S1 to S3

## 7 **Supplementary Text**

### 8 **Text S1. Experimental Design and Sampling Methods for $\delta^{15}\text{N}$ in Livestock Farms.**

#### 9 **Experimental Design.**

10 The  $\text{NH}_3$  emissions from livestock and poultry farming are collected from the  $\text{NH}_3$  emitted by the  
11 livestock houses. The layer farms and fattening pig farms have enclosed livestock houses. To achieve  
12 effective ventilation, the chicken houses adopt a negative pressure longitudinal ventilation mode. Each  
13 layer house is equipped with 8 exhaust fans (Figure S1), with a single fan diameter of 138 cm and a fan  
14 speed of  $1,400 \text{ r}\cdot\text{min}^{-1}$ . During the sampling period, a maximum of 6 exhaust fans were operated  
15 simultaneously. Three air samplers were evenly distributed 2.0 meters from the exhaust outlets for  
16 sampling, with the air samplers positioned at a height of 1.6 meters. The fattening pig housing employs  
17 a negative pressure longitudinal ventilation system, with each building equipped with six exhaust fans.  
18 Each fan has a diameter of 110 cm, a rotational speed of  $560 \text{ r}\cdot\text{min}^{-1}$ , and a rated power of 1.1 kW (Figure  
19 S2). Sampling points are set at the exhaust outlets of the fattening pig housing, with three sampling points  
20 located 2 meters behind the center of the negative pressure fans at a height of 1.6 meters. The selected  
21 dairy cow shed for the study features an open structure, with four sampling points set along the aisle  
22 inside the shed. Each sampling point inside the shed is spaced 10 meters apart at a height of 1.6 meters  
23 (Figure S3).

#### 24 **Sampling method.**

25 Use deionized water as the  $\text{NH}_3$  absorption solution. Transfer 10 ml of unused clean deionized water

26 to a large bubble absorption bottle. Connect the absorption bottle to the air sampler using a 10 cm rubber  
27 hose. Set the gas sampling flow rate of the air sampler to 2 L·min<sup>-1</sup> and perform a single sample  
28 collection for 60 minutes. After sampling, transfer the absorption solution to a 10 ml centrifuge tube and  
29 store it at -20°C for subsequent determination of δ<sup>15</sup>N.

30 **Supplementary Figures**

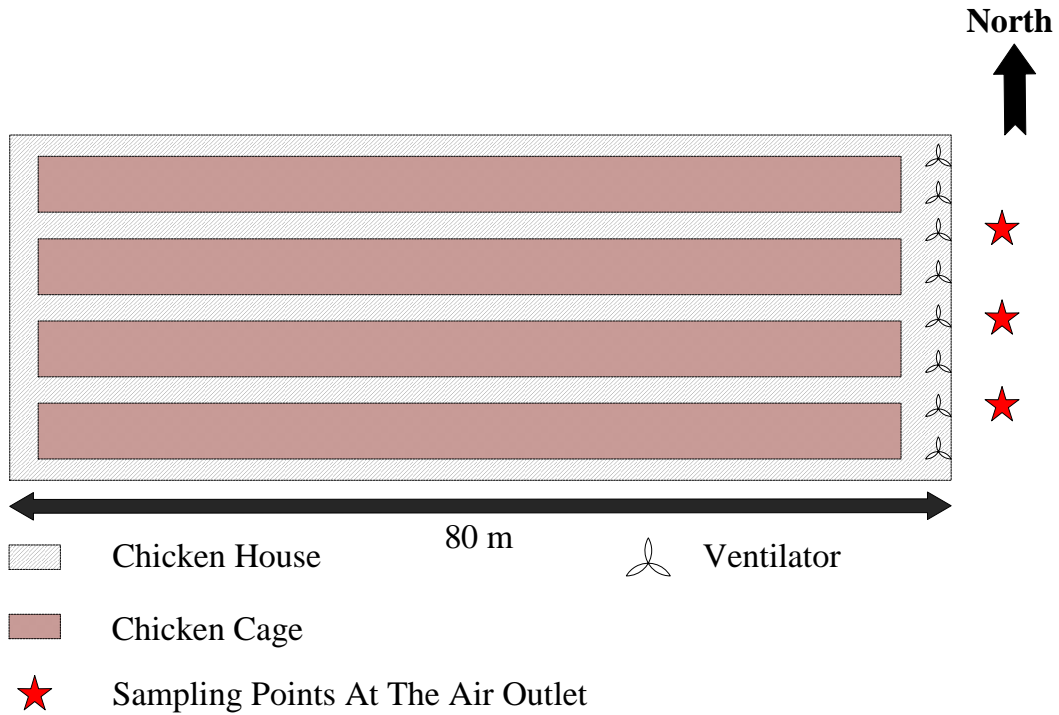

31  
32 Figure S1. Structure of the intensive layer farm hen house, with the placement of atmospheric samplers  
33 at sampling points.

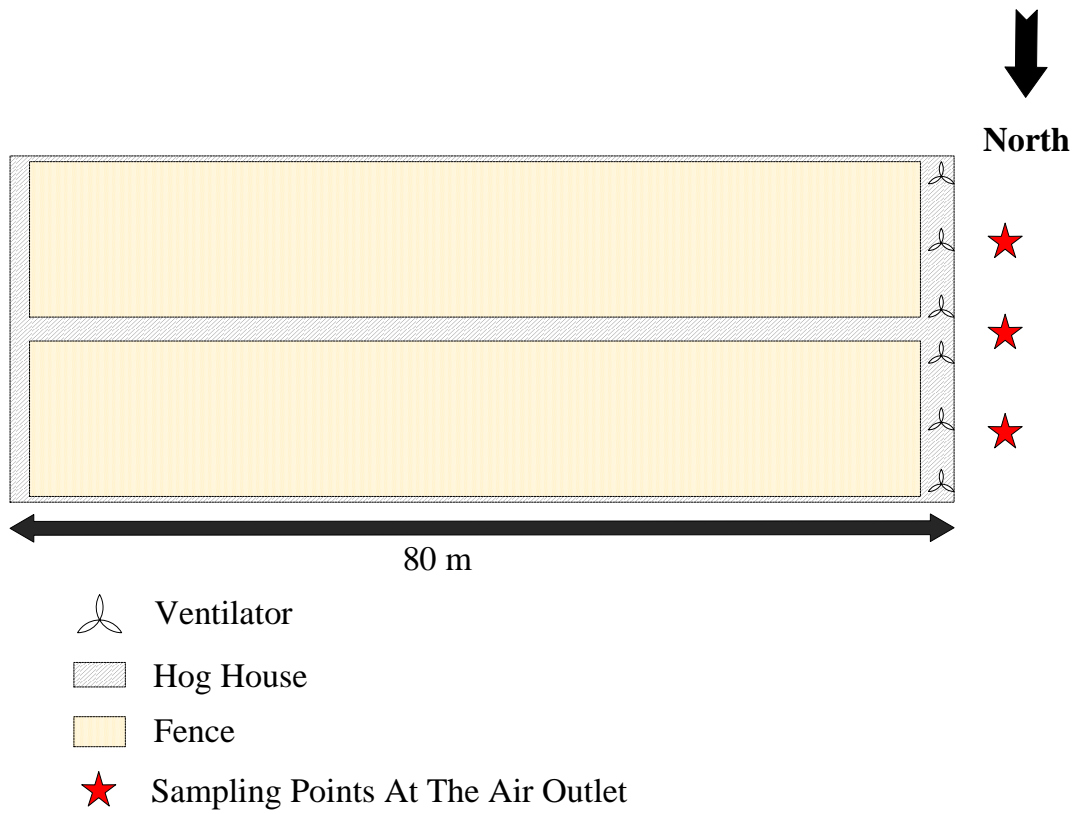

34

35 Figure S2. Structure of pig pens in an intensive fattening pig farm, with locations of atmospheric samplers

36 for sampling points.

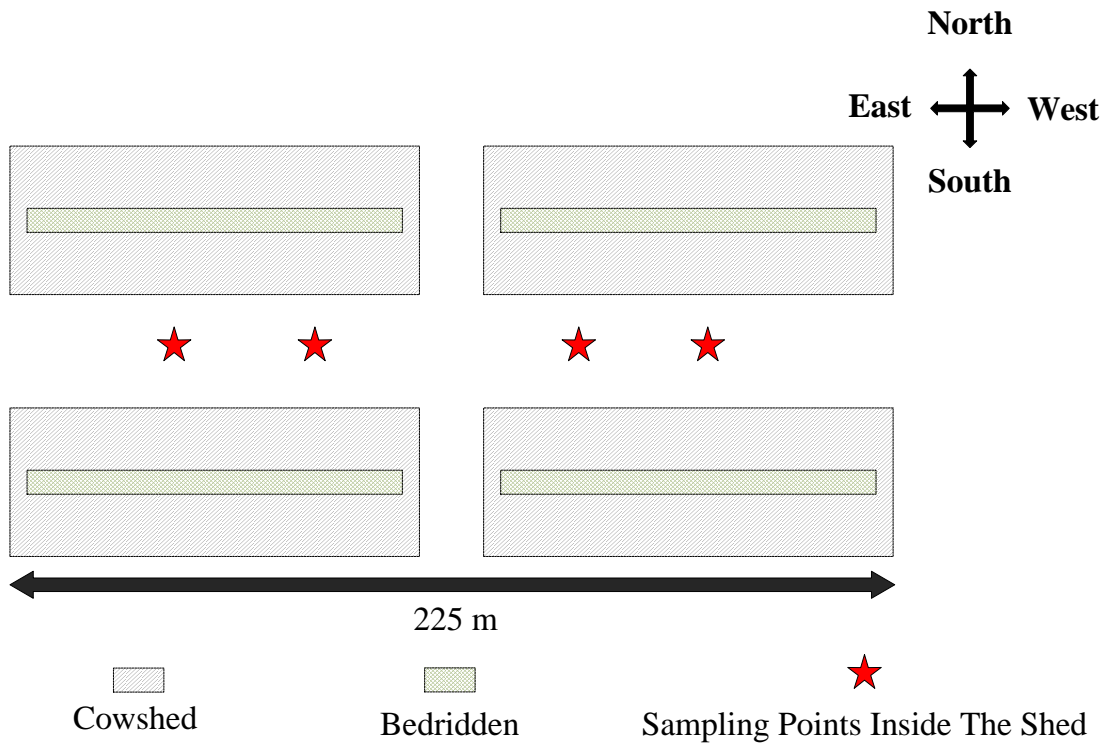

37

38 Figure S3. Structure of the dairy cow barn in an intensive dairy farm, showing the placement of

39 atmospheric samplers at sampling points inside the barn.

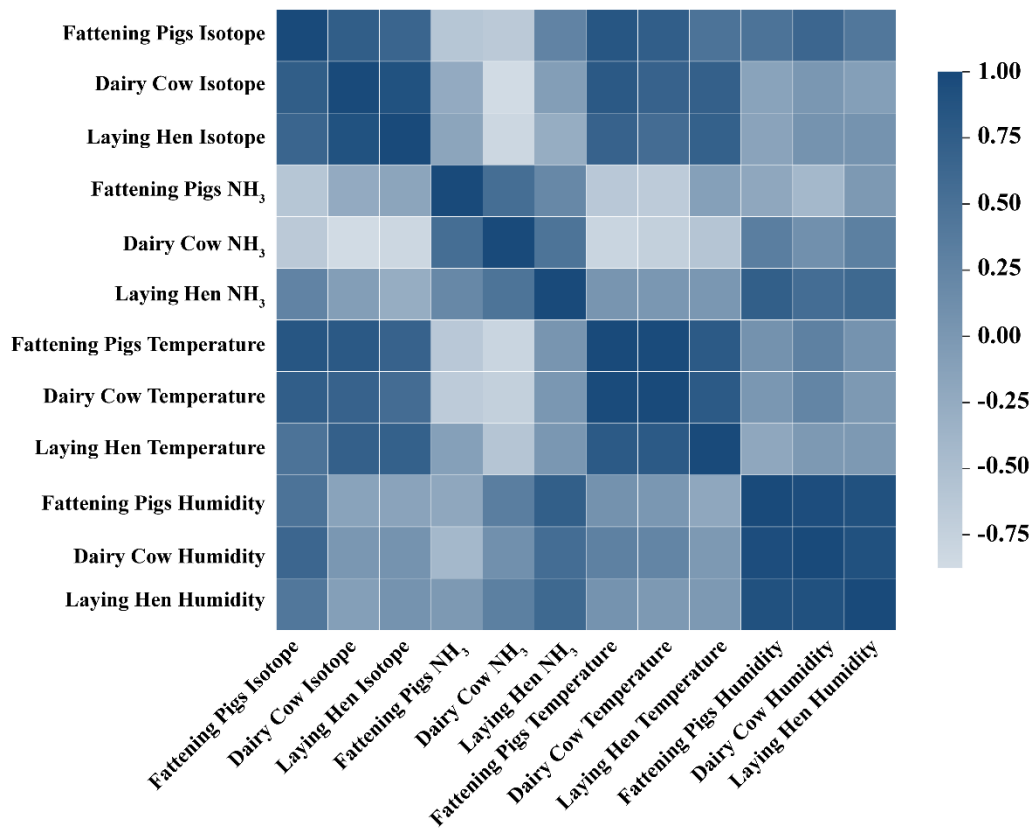

40

41 Figure S4. The correlation variations among NH<sub>3</sub> concentration, temperature, humidity, wind speed, and  
 42 atmospheric pressure in different farms. Darker colors in the figure indicate higher correlations, while  
 43 lighter colors represent weaker correlations.

44 **Supplementary Table**

45 Table S1 Variations in Temperature, Humidity and Ventilation Volume during  
 46 Sampling at Fattening Pig Farms.

| <b>Fatting pig</b> | <b>Temperature (°C)</b> | <b>Humidity (%RH)</b> | <b>Ventilation Rate(m<sup>3</sup>·h<sup>-1</sup>)</b> |
|--------------------|-------------------------|-----------------------|-------------------------------------------------------|
| May.               | 29                      | 57%                   | 7612                                                  |
| Jun.               | 30                      | 63%                   | 8525                                                  |
| Sep.               | 31                      | 70%                   | 9439                                                  |
| Oct.               | 19                      | 67%                   | 8025                                                  |
| Nov.               | 17                      | 64%                   | 7918                                                  |
| Dec.               | 15                      | 61%                   | 8950                                                  |

47

48 Table S2 Variations in Sampling Time, Temperature, Humidity and Ventilation

## Volume at Layer Farms.

| Laying hens | Temperature (°C) | Humidity (%RH) | Ventilation Rate(m <sup>3</sup> ·h <sup>-1</sup> ) |
|-------------|------------------|----------------|----------------------------------------------------|
| May.        | 29               | 58%            | 27796                                              |
| Jun.        | 30               | 65%            | 26812                                              |
| Sep.        | 28               | 68%            | 29934                                              |
| Oct.        | 18               | 65%            | 21212                                              |
| Nov.        | 11               | 63%            | 3892                                               |

50

51

Table S3 Variations in temperature, humidity and ventilation rate during sampling

52

at dairy farms.

| Dairy cow | Temperature (°C) | Humidity (%RH) | Ventilation Rate (m <sup>3</sup> ·h <sup>-1</sup> ) |
|-----------|------------------|----------------|-----------------------------------------------------|
| May.      | 29               | 58%            | 5×10 <sup>6</sup>                                   |
| Jun.      | 30               | 65%            | 2×10 <sup>6</sup>                                   |
| Sep.      | 28               | 68%            | 3×10 <sup>6</sup>                                   |
| Oct.      | 18               | 65%            | 5×10 <sup>6</sup>                                   |
| Nov.      | 11               | 63%            | 6.0×10 <sup>6</sup>                                 |
| Dec.      | 9                | 60%            | 2×10 <sup>6</sup>                                   |

53
